# Supplementary material for: Marine Alkaloid 2,2-Bis(6-bromo-3-indolyl) Ethylamine and Its Synthetic Derivatives Inhibit Microbial Biofilms Formation and Disaggregate Developed Biofilms
Source: PubMed Central journal article supplement (PMC6406822; doi:10.3390/microorganisms7020028), 2019-01-23
Supplement: microorganisms-07-00028-s001.pdf [file microorganisms-07-00028-s001.pdf]

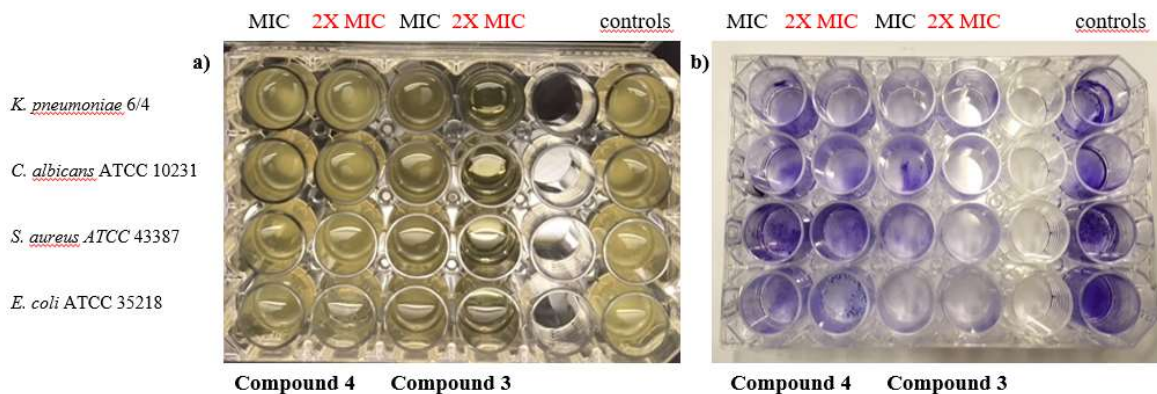

**Figure S1.** Biofilms formation of *K. pneumoniae* 6/4, *C. albicans* ATCC 10231, *S. aureus* ATCC 43387 and *E. coli* ATCC 35218 in presence of compounds 3 and 4 at their relative MIC and 2× MIC values after 24 h of incubation at 37 °C (a). Biofilms formation inhibition was assessed by CV staining. Representative images of biofilms formation inhibition (b) as appear after PBS washing and prior to CV ethanol dissolution and reading at 570 nm: the clear wells with no formed biofilms were impossible to read by spectrophotometer because the staining resulted negative (complete inhibition).
